# Supplementary material for: Completion of the Continuum of Maternity Care in the Emerging Regions of Ethiopia: Analysis of the 2019 Demographic and Health Survey
Source: MDPI journal article supplement (doi:10.3390/ijerph20136320), 2023-07-07
Supplement: s1 [file s1]

Table S1: Factors associated with four or more ANC utilisation in the emerging regions of Ethiopia in the bivariable analysis (N: 1431).

| Variables                                           | Categories                          | ANC4+ |     |                      |
|-----------------------------------------------------|-------------------------------------|-------|-----|----------------------|
|                                                     |                                     | Yes   | No  | OR (95%CI)           |
| <b>Maternal age at the time of delivery (years)</b> | <20                                 | 77    | 173 | 1                    |
|                                                     | 20-34                               | 293   | 703 | 0.77 (0.53-1.12)     |
|                                                     | 35-49                               | 47    | 138 | 0.57 (0.30-1.06)     |
| <b>Residence</b>                                    | Rural                               | 303   | 872 | 1                    |
|                                                     | Urban                               | 114   | 142 | 3.21 (1.83-5.61) **  |
| <b>Region</b>                                       | Afar                                | 108   | 279 | 1                    |
|                                                     | Somali                              | 30    | 311 | 0.27 (0.13-0.56) **  |
|                                                     | Benishangul                         | 187   | 182 | 2.77 (1.59-4.84) **  |
|                                                     | Gambela                             | 92    | 242 | 1.02 (0.54-1.91)     |
| Marital status                                      | Not married/not living with partner | 35    | 90  | 1                    |
|                                                     | Married/living with partner         | 382   | 924 | 1.16 (0.67-1.99)     |
| <b>Highest level of maternal education</b>          | No education                        | 187   | 667 | 1                    |
|                                                     | Primary                             | 168   | 251 | 3.47 (2.38-5.07) **  |
|                                                     | Secondary and higher                | 62    | 96  | 5.68 (2.63-12.28) ** |
| <b>Sex of the head of the household</b>             | Male                                | 305   | 686 | 1                    |
|                                                     | Female                              | 112   | 328 | 0.53 (0.36-0.76) **  |
| <b>Household wealth index</b>                       | Poorest                             | 137   | 637 | 1                    |
|                                                     | Poorer                              | 78    | 133 | 3.03 (1.51-6.10) *   |
|                                                     | Middle                              | 63    | 92  | 3.29 (1.69-6.43) *   |
|                                                     | Richer                              | 64    | 77  | 3.53 (1.84-6.80) **  |
|                                                     | Richest                             | 75    | 75  | 4.67 (2.40-9.11) **  |
| <b>Number of children</b>                           | 1-2                                 | 165   | 334 | 1                    |
|                                                     | 3-4                                 | 100   | 273 | 0.58 (0.37-0.91) *   |
|                                                     | > = 5                               | 152   | 407 | 0.51 (0.34-0.77) *   |

P-value: \* < 0.05, \*\* < 0.001

Table S2: Factors associated with institutional delivery in the emerging regions of Ethiopia in the bivariable analysis (N: 1431).

| Variables                                           | Categories                          | Institutional delivery |     |                       |
|-----------------------------------------------------|-------------------------------------|------------------------|-----|-----------------------|
|                                                     |                                     | Yes                    | No  | OR (95%CI)            |
| <b>Maternal age at the time of delivery (years)</b> | <20                                 | 119                    | 131 | 1                     |
|                                                     | 20-34                               | 416                    | 580 | 0.80 (0.54-1.18)      |
|                                                     | 35-49                               | 67                     | 118 | 0.57 (0.30-1.08)      |
| <b>Residence</b>                                    | Rural                               | 414                    | 761 | 1                     |
|                                                     | Urban                               | 188                    | 68  | 5.48 (2.60-11.57) **  |
| <b>Region</b>                                       | Afar                                | 105                    | 282 | 1                     |
|                                                     | Somali                              | 71                     | 270 | 0.71 (0.34-1.49)      |
|                                                     | Benishangul                         | 231                    | 138 | 4.12 (1.92-8.82) **   |
|                                                     | Gambela                             | 195                    | 139 | 5.87 (3.28-10.51) **  |
| <b>Marital status</b>                               | Not married/not living with partner | 71                     | 54  | 1                     |
|                                                     | Married/living with partner         | 531                    | 775 | 0.32 (0.17-0.61) **   |
| <b>Highest level of maternal education</b>          | No education                        | 239                    | 615 | 1                     |
|                                                     | Primary                             | 238                    | 181 | 3.20 (1.85-5.54) **   |
|                                                     | Secondary and higher                | 125                    | 33  | 11.82 (1.95-71.80) *  |
| <b>Sex of the head of the household</b>             | Male                                | 413                    | 578 | 1                     |
|                                                     | Female                              | 189                    | 251 | 1.31 (0.86-2.01)      |
| <b>Household wealth index</b>                       | Poorest                             | 175                    | 599 | 1                     |
|                                                     | Poorer                              | 112                    | 99  | 3.85 (2.32-6.39) **   |
|                                                     | Middle                              | 89                     | 66  | 3.08 (1.68-5.65) **   |
|                                                     | Richer                              | 99                     | 42  | 7.88 (3.44-18.04) **  |
|                                                     | Richest                             | 127                    | 23  | 18.06 (8.95-36.44) ** |
| <b>Number of children</b>                           | 1-2                                 | 165                    | 334 | 1                     |
|                                                     | 3-4                                 | 100                    | 273 | 0.49 (0.34-0.71) **   |
|                                                     | >= 5                                | 152                    | 407 | 0.52 (0.36-0.74) **   |

P-value: \* < 0.05, \*\* < 0.001

Table S3: Factors associated with postnatal care utilisation within 24 hours in the emerging regions of Ethiopia in the bivariable analysis (N: 1431)

| Variables                                    | Categories                          | PNC within 24 hours |      |                       |
|----------------------------------------------|-------------------------------------|---------------------|------|-----------------------|
|                                              |                                     | Yes                 | No   | OR (95%CI)            |
| Maternal age at the time of delivery (years) | <20                                 | 79                  | 171  | 1                     |
|                                              | 20-34                               | 252                 | 744  | 0.70 (0.51-0.96) *    |
|                                              | 35-49                               | 48                  | 137  | 0.55 (0.35-0.84) *    |
| Residence                                    | Rural                               | 257                 | 918  | 1                     |
|                                              | Urban                               | 122                 | 134  | 3.24 (1.87-5.63) **   |
| Region                                       | Afar                                | 77                  | 310  | 1                     |
|                                              | Somali                              | 30                  | 311  | 0.41 (0.22-0.77) *    |
|                                              | Benishangul                         | 151                 | 218  | 2.64 (1.68-4.14) **   |
|                                              | Gambela                             | 121                 | 213  | 3.54 (2.08-6.02) **   |
| Marital status                               | Not married/not living with partner | 47                  | 78   | 1                     |
|                                              | Married/living with partner         | 332                 | 974  | 0.60 (0.33-1.07)      |
| Highest level of maternal education          | No education                        | 147                 | 707  | 1                     |
|                                              | Primary                             | 146                 | 273  | 3.17 (1.96-5.13) **   |
|                                              | Secondary and higher                | 86                  | 72   | 12.12 (6.73-21.85) ** |
| Sex of the head of the household             | Male                                | 257                 | 734  | 1                     |
|                                              | Female                              | 122                 | 318  | 0.82 (0.54-1.24)      |
| Household wealth index                       | Poorest                             | 104                 | 670  | 1                     |
|                                              | Poorer                              | 65                  | 146  | 2.34 (1.30-4.24) *    |
|                                              | Middle                              | 57                  | 98   | 2.88 (1.53-5.42) *    |
|                                              | Richer                              | 59                  | 82   | 6.10 (2.26-16.49) *   |
|                                              | Richest                             | 94                  | 56   | 10.26 (5.41-19.46) ** |
| Number of children                           | 1-2                                 | 170                 | 329  | 1                     |
|                                              | 3-4                                 | 68                  | 305  | 0.54 (0.32-0.93) *    |
|                                              | > = 5                               | 141                 | 418  | 0.64 (0.43-0.95) *    |
| Mode of delivery                             | Vaginal                             | 350                 | 1042 | 1                     |
|                                              | Caesarean section                   | 29                  | 10   | 7.86 (1.90-32.48) **  |

P-value: \* < 0.05, \*\* < 0.001
